# Supplementary material
Source: HighWire-hosted journal article supplement (https://jitc.bmj.com/content/9/11/e003224)
Supplement: inline-supplementary-material-5 [file inline-supplementary-material-5.xlsx]

## Sheet: Tabelle1
Target	Fluorophore	Isotype	Reactivity	Application	Use at	Provider	Code	Clone
CD56	PerCP-Cy5.5/ FITC	Mouse IgG1	Human	Phenotyping FC	1:75	BD	560842	B195
NKp46	PerCP-Cy5.5/ FITC	Rat IgG2a, κ	Mouse		1:100	Biolegend	137601	29A1.4
CD3	V500	Mouse IgG1	Human		1:100	BD	561416	UCHT1
	V500/FITC	Rat IgG2b, κ	Mouse		1:100	Biolegend	100201	17A2
CD4	AF488	Rat IgG2b, κ	Mouse		1:100	Biolegend	100405	GK1.5
CD8	PECy7	Mouse IgG1	Human		1:100	BD	557746	RPA-T8
	APCCy7	Rat IgG2a, κ	Mouse			Biolegend	100707	53-6.7
CD16	PECY7	Mouse IgG1	Human		1:100	Biolegend	302016	3G8
NKG2D	PE	Mouse IgG1	Human		1:100	BD	561815	1D11
	BV421/FITC	Rat IgG1, κ	Mouse		1:100	Biolegend	101301/2	CX5
NKG2A	BV421	Mouse IgG2a	Human		1:100	BD	747923	131411
PD-1 (CD279)	PE-Cy7	Mouse IgG1	Human		1:100	Biolegend	329918	EH12.2H7
DNAM-1	FITC	Mouse IgG1	Human		1:100	Biolegend	337104	TX25
CD44	PE	Rat IgG2b, κ	Mouse		1:100	Biolegend	103024	IM7
CD62L	AF488	Rat IgG2a, κ	Mouse		1:100	Biolegend	104412	MEL-14
CD69	APCCy7	Mouse IgG1	Human		1:100	BD	560912	FN50
CD2	FITC	Mouse IgG1	Human	Cytotoxicity receptors /activation	1:100	Biolegend	300206	RPA-2.10
CD57	PE	Mouse IgG1	Human		1:100	Biolegend	322311	HCD57
NKp30	PE/Cy7	Mouse IgG1	Human		1:100	Biolegend	325213	P30-15
NKp46	BV421	Mouse IgG2a	Human		1:100	Biolegend	331913	9E2
CD158a	PE	Mouse IgG1	Human		1:100	Biolegend	374903	HP-DM1
CD158b	APC	Mouse IgG1	Human		1:100	Biolegend	312611	DX27
CD117	APC/Cy7	Mouse IgG2a	Human		1:100	Biolegend	313227	104D2
CD11a	A647	Mouse IgG1	Human	FC/IF	1:100/1:50	Biolegend	301218	HI111
CD18	FITC	Mouse IgG1	Human	FC/IF	1:100/1:50	Biolegend	302105	TS1/18
LFA1	A488	Mouse IgG1	Human	FC/IF	1:100/1:50	Biolegend	363403	m24
CD107a	BV421/FITC	Mouse IgG1	Human	Degranulation/ cytotoxicity (FC/IF)	1:75	BD	562623	H4A3
Perforin (active)	A488/A647/PE	Mouse IgG2b	Human	Active perforin (FC/IF)	01:50:00	BD	563764	δG9
Perforin (mouse)	A488/A647/PE	Rat IgG2a	Mouse	FC	1:75	Novus	NBP1-97512AF488	CB5.4
Granzyme A	PE/A594	Mouse IgG1	Human	Granzyme A stain (FC/IF)	01:50:00	Biolegend	507206	CB9
Granzyme B	A647	Mouse IgG1	Hu/Mu	Granzyme B stain (FC/IF)	01:50:00	BD	560212	GB11
INFg	APC	Rat IgG1	Mouse	INF-g stain tumor model	1:100	Biolegend	505810	XMG1.2
RAGE (AGER)	-	Rabbit IgG	Hu/Mu/Rat	RAGE expression IF-FC	2ug/ml	abcam	ab37647	Polyclonal
	A488	Rabbit IgG	Hu/Mu/Rat	RAGE expression IF-FC	1:100	Bioss	bs-4999R-A488	Polyclonal
	-	Mouse IgG2b	Human	RAGE Blocking assay	4-12ug/ml	abcam	ab89911	MM0520-8D11
	-	Poly Goat IgG	Hu/Mu/Rat	RAGE Blocking assay	1ug	RnD	AF1145	Polyclonal
IL13ra2	FITC/APC	Human IgG1	Human	IL13ra2 expression Fc	01:50:00	Miltenyi	130104670	REA308
CHI3L1	-	Mouse IgG1	Human	Neutralizing in vitro and In vivo	-	Millipore	MABC196	mAY
	-	Rat IgG2b	Mouse	WB,IHC	1:500 WB	RnD	MAB2649	321924
		Goat IgG	Human	CHI3L1 expression FC,WB,IHC			AF2599	Polyclonal
Stathmin	AF488	Rabbit IgG	Hu/Mu/Rat	ICC/IF, FC	1:100	abcam	ab199735	EP1573Y
ERK1/2 (pT202/pY204)	A488	Mouse IgG1	Human	Phosphoflow	01:50:00	BD	612592	20A
Akt (pS473)	PE	Mouse IgG1	Human	Phosphoflow	01:50:00	BD	560378	M89-61
Stat3 (pY705)	A647	Mouse IgG1	Human	Phosphoflow	01:50:00	BD	557815	4/P-STAT3
JNK (pT183/pY185)	A647	Mouse IgG1	Human	Phosphoflow	01:50:00	BD	562481	Clone N9-66
Trastuzumab		Human IgG1	Human	Cytotoxicity assay/In vivo	10ug/ml	Roche
